# Supplementary material
Source: Springer Nature journal article supplement (https://www.springermedizin.de/resource/supplementary/12891_2009_766_MOESM2_ESM.pdf/9506766)

◇ Nutrient dense    ■ Energy dense    ▲ Difference    × Intake

Men:  
25-49 year old

Men:  
50+ years old

Women:  
Premenopause

Women:  
Postmenopause

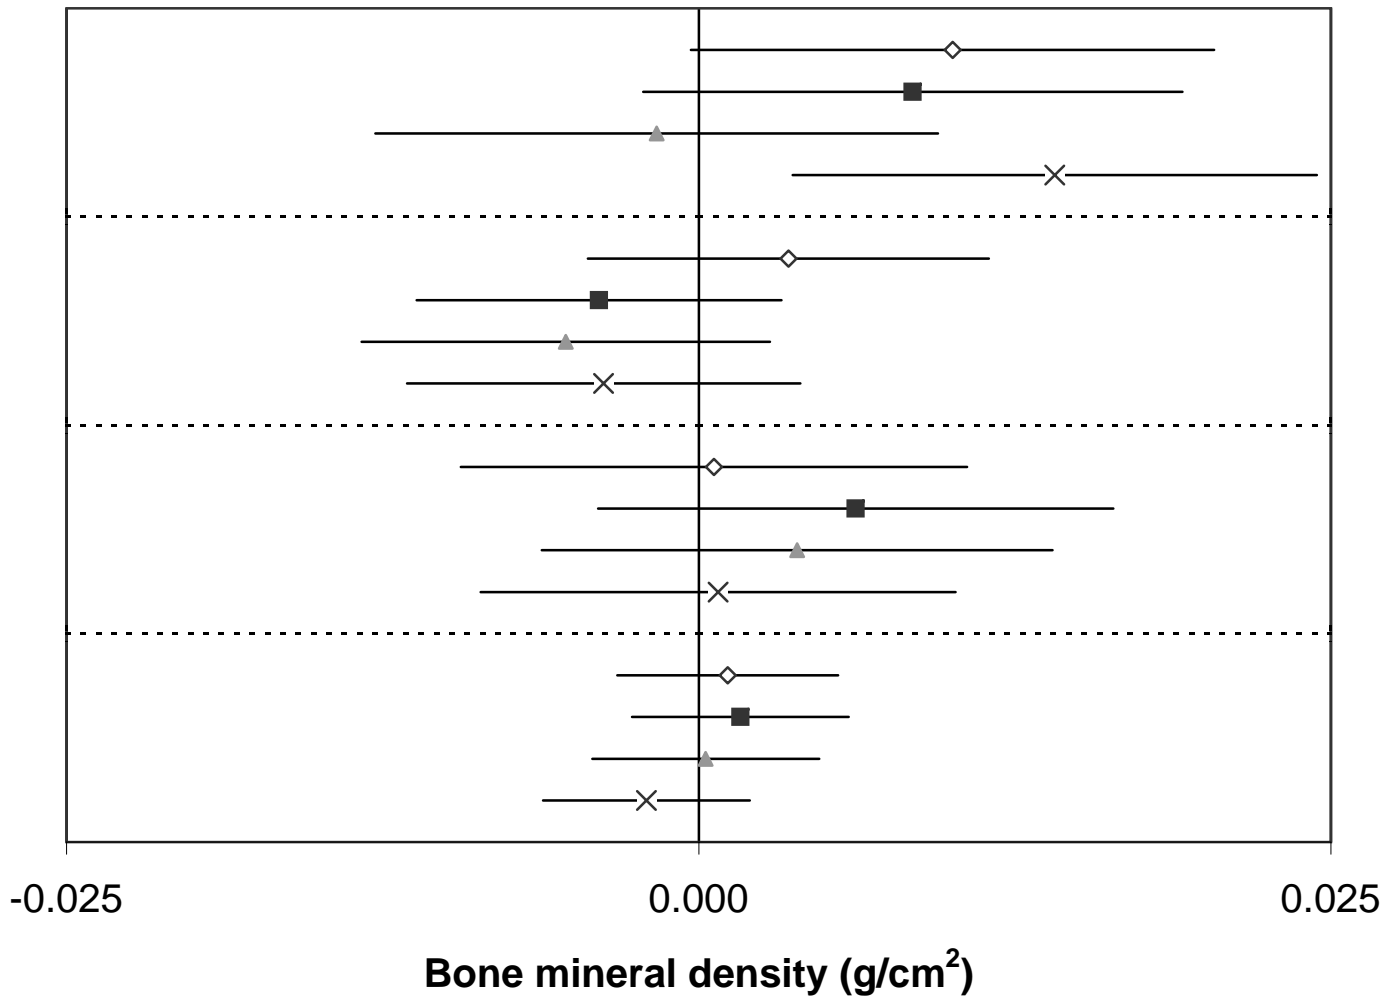

Supplement: MOESM2 [file 9506766]
